# Supplementary material
Source: PubMed Central journal article supplement (PMC2799353)

*CaMV 35S:Free GFP*

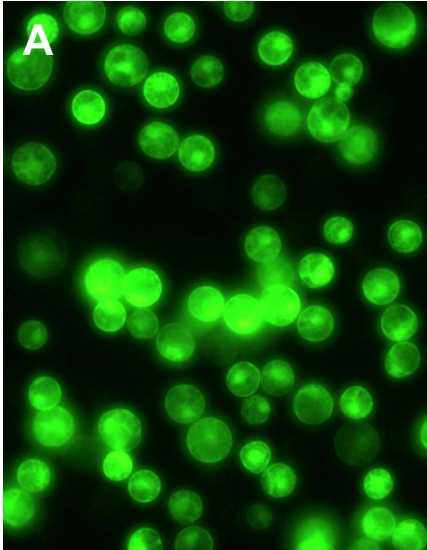

UV-B

*CaMV 35S:AtTZF1-GFP*  
+  
*CaMV 35S:GASA6-mCherry*

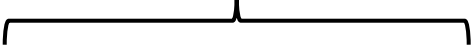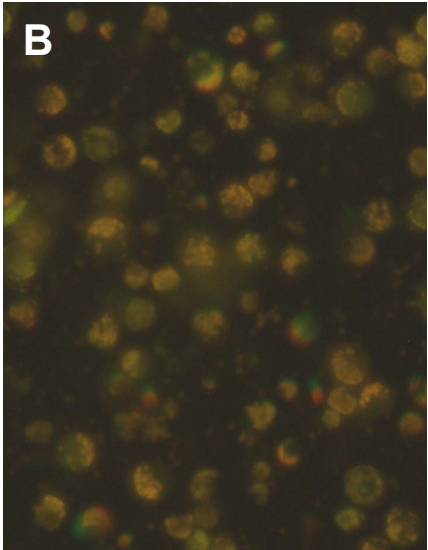

UV-B

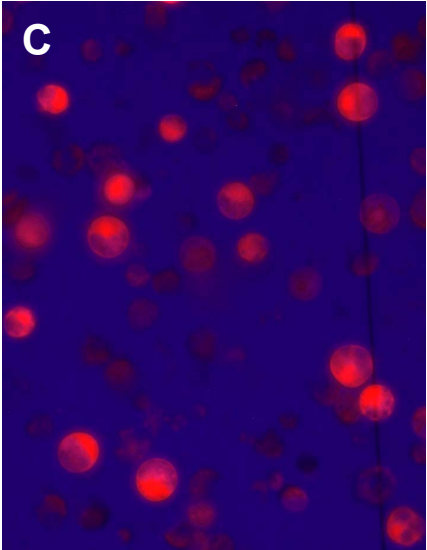

Red

Supplement: pp.109.145656_1.pdf [file pp.109.145656_1.pdf]

*CaMV 35S:AtTZF1-GFP*

*CaMV 35S:Free GFP*

10  $\mu$ g

20  $\mu$ g

40  $\mu$ g

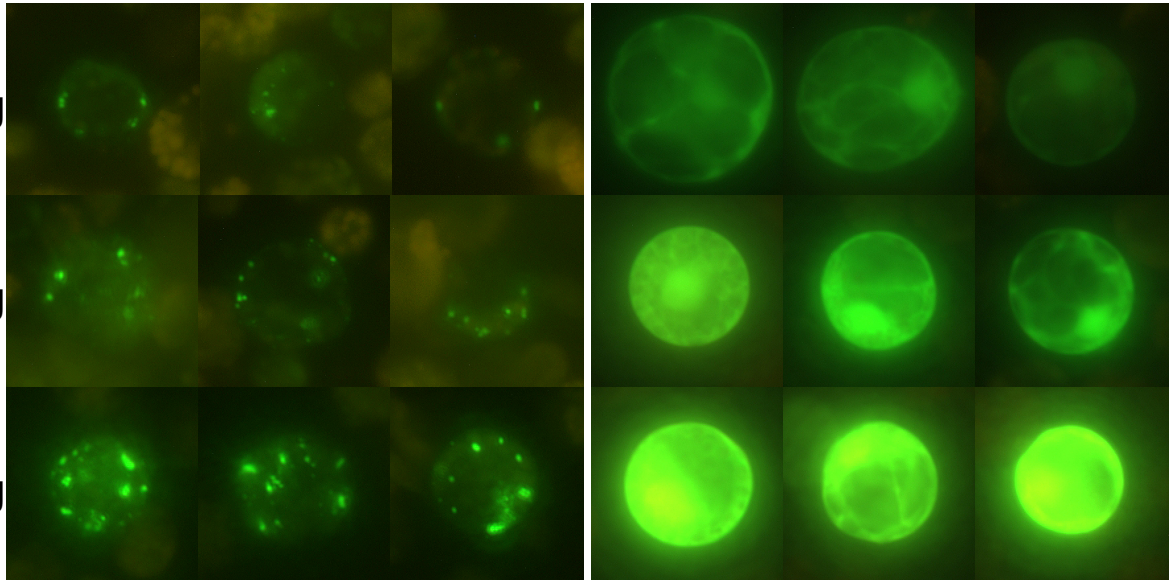

Supplement: pp.109.145656_2.pdf [file pp.109.145656_2.pdf]
